# Supplementary material for: Synthesis and electronic properties of π-extended flavins
Source: Royal Society of Chemistry journal article supplement (doi:10.1039/c5ob01418b), 2015-01-01
Supplement: c5ob01418b1.pdf [file c5ob01418b1.pdf]

## Synthesis and Electronic Properties of $\pi$ -Extended Flavins

L.N. Mataranga-Popa,<sup>a,b</sup> I. Torje,<sup>b</sup> T. Ghosh,<sup>a</sup> M.J. Leitzl,<sup>a</sup> A. Späth,<sup>a</sup> M. L. Novianti,<sup>c</sup> R. D. Webster<sup>c\*</sup> and B. König<sup>a</sup>

<sup>a</sup> University of Regensburg, Universitätsstraße 31, 93053 Regensburg, Germany.  
E-mail: burkhard.koenig@chemie.uni-regensburg.de.

<sup>b</sup> Babes-Bolyai University Cluj-Napoca, Faculty of Chemistry and Chemical Engineering, Arany Janos Str. 11, Cluj-Napoca, 400428 Romania

<sup>c</sup> Division of Chemistry & Biological Chemistry, School of Physical and Mathematical Sciences, Nanyang Technological University, 21 Nanyang Link, 637371 Singapore. E-mail: Webster@ntu.edu.sg

## Supplementary Information (SI)

|                                                                                    | Page |
|------------------------------------------------------------------------------------|------|
| a) General experimental conditions                                                 | S-2  |
| b) Synthesis of the amines <b>2a</b> – <b>2c</b>                                   | S-2  |
| c) <sup>1</sup> H and <sup>13</sup> C NMR spectra of <b>2a</b> and <b>2b</b>       | S-4  |
| <sup>1</sup> H NMR spectra of <b>2a</b>                                            | S-4  |
| <sup>13</sup> C NMR spectra of <b>2a</b>                                           | S-4  |
| DEPT NMR spectra of <b>2a</b>                                                      | S-5  |
| <sup>1</sup> H NMR spectra of <b>2b</b>                                            | S-6  |
| <sup>13</sup> C NMR spectra of <b>2b</b>                                           | S-6  |
| DEPT NMR spectra of <b>2b</b>                                                      | S-7  |
| d) <sup>1</sup> H and <sup>13</sup> C NMR spectra of <b>3a</b> - <b>3c</b>         | S-8  |
| <sup>1</sup> H NMR spectra of <b>3a</b>                                            | S-8  |
| <sup>13</sup> C NMR spectra of <b>3a</b>                                           | S-8  |
| <sup>1</sup> H NMR spectra of <b>3b</b>                                            | S-9  |
| <sup>13</sup> C NMR spectra of <b>3b</b>                                           | S-9  |
| DEPT NMR spectra of <b>3b</b>                                                      | S-10 |
| <sup>1</sup> H NMR spectra of <b>3c</b>                                            | S-11 |
| <sup>13</sup> C NMR spectra of <b>3c</b>                                           | S-11 |
| e) Selected molecular orbitals for compounds <b>3a</b> , <b>3b</b> , and <b>3c</b> | S-12 |
| f) References                                                                      | S-12 |

## a) General experimental conditions

Reagents, catalysts, ligands were purchased reagent grade and used without further purification. The used solvents were dried and distilled according to standard procedures.<sup>1</sup> Column chromatography: silica gel 60, mesh 70-230. TLC: silica gel plates.

Analytical characterization of the synthesized compounds was done by common methods. Melting Points were determined on Büchi SMP or a Lambda Photometrics OptiMelt MPA 100 and are uncorrected. IR Spectra were recorded with a Bio-Rad FT-IR Excalibur FTS 3000 equipped with a Specac *Golden Gate* Diamond Single Reflection ATR-System. NMR spectra were recorded in CDCl<sub>3</sub> and TFA<sub>d</sub> on Bruker Avance 300 (<sup>1</sup>H: 300.1 MHz, <sup>13</sup>C: 75.5 MHz, T = 300 K) relative to external standards unless stated otherwise. The assignments of quaternary C, CH, CH<sub>2</sub> and CH<sub>3</sub> have been made by using DEPT spectra. Electro spray mass spectra were performed on a Finnigan MAT TSQ 7000 ESI-spectrometer. Other Mass Spectra were recorded on Varian CH-5 (EI), Finnigan MAT 95 (CI; FAB and FD); Xenon serves as the ionization gas for FAB.

### Fluorescence spectra

Luminescence spectra were performed with UV-grade solvents (Baker or Merck) in 1 cm quartz cuvettes (Hellma and recorded using a Fluorolog 3-22 (Horiba Jobin Yvon) spectrophotometer. Emission decay times were measured with a cooled photomultiplier (RCA C7164R) combined with a FAST ComTec multichannel scaler PCI card with a time resolution of 250 ps. For absolute measurements of photoluminescence quantum yields at ambient temperature and at 77 K a Hamamatsu Photonics (C9920-02) system was used.

**Cyclic voltammograms (CVs)** were recorded in dimethyl sulfoxide (DMSO) solutions containing 0.2 M *n*-Bu<sub>4</sub>NPF<sub>6</sub> as the supporting electrolyte. Voltammetric experiments were controlled with a computer-controlled Eco Chemie Autolab PGSTAT 100 with an ADC fast scan generator. The working electrode was a 1 mm diameter planar Pt disk, the auxiliary electrode a Pt wire and the reference electrode was an Ag wire separated from the test solution with a salt bridge containing 0.5 M *n*-Bu<sub>4</sub>NPF<sub>6</sub> in acetonitrile. Test solutions were thoroughly deoxygenated by purging with Ar gas prior to voltammetric analysis.

## b) Synthesis of the amines 2a – 2c

### General procedure for the syntheses of amines (GP2)

In a dry Schlenk flask was added, under inert atmosphere and continuous stirring, sodium *tert*-butoxide (1.2 mole), palladium acetate (0.005 mole), anhydrous 1,4-dioxane, tri-*tert*-butylamine (0.005 mole), bromo-derivative (1 mole) and *n*-butylamine (1.2 mole). The reaction mixture was moved in to preheated oil bath at 80°C and stirred for 19 h. After cooling to room temp., the solution was diluted with deionized water and methylene chloride. The aqueous phase was extracted with small portions of methylene chloride, the combined organic phases were dried over anhydrous MgSO<sub>4</sub> and the solvents were removed *in vacuo*. The residue was chromatographed on silica gel (petroleum ether : ethyl acetate; 100:1) to furnish the products **2a – 2c** as solids or resins.

### *N*-Butylpyren-4-amine (2a)

This compound was synthesized according to **GP 2** and after purification by flash-chromatography on silica gel (petroleum ether : ethyl acetate; 100:1) compound **2a** (340 mg, 70%) was obtained as a yellow solid. Mp. 77-79°C. *R<sub>f</sub>* (petroleum ether: ethyl acetate; 10:1): 0.50.

<sup>1</sup>H-NMR (300 MHz, CDCl<sub>3</sub>, δ ppm): 1.07 (t, *J* = 6 Hz, 3 H), 1.62 (m, 2 H), 1.89 (m, 2 H), 3.50 (t, *J* = 6 Hz, 2 H), 4.53 (s, 1 H), 7.13 (s, 1 H), 7.93 (t, *J* = 6 Hz, 2 H), 8.01 (m, 4 H), 8.13 (d, *J* = 9 Hz, 1 H), 8.18 (d, *J* = 9 Hz, 1 H). <sup>13</sup>C-NMR (300 MHz, CDCl<sub>3</sub>, δ ppm): 14.40 (CH<sub>3</sub>), 20.98 (CH<sub>2</sub>), 31.91 (CH<sub>2</sub>), 44.35 (CH<sub>2</sub>), 102.03 (CH), 117.26 (C<sub>quat</sub>), 120.27 (C<sub>quat</sub>), 121.80 (C<sub>quat</sub>), 123.27 (CH), 125.25 (CH), 125.43 (CH), 125.50 (CH), 125.66 (CH), 126.62 (CH), 127.28 (CH), 128.11 (CH), 131.18 (C<sub>quat</sub>), 132.09 (C<sub>quat</sub>), 133.21 (C<sub>quat</sub>), 142.40 (C<sub>quat</sub>). IR (ν, cm<sup>-1</sup>): 3369 (w), 3046 (m), 2952 (m), 2926 (m), 2860 (m), 1468 (m), 1169 (m), 1129 (w), MS (ES-MS) *m/z*: 274 (M<sup>+</sup>+H). Anal. calcd. f. C<sub>20</sub>H<sub>19</sub>N: C 87.87, H 7.01, N 5.12, found: C 87.68, H 6.90, N 5.07.

### *N*-Butylanthracen-2-amine (2b)

This compound was synthesized according to **GP 2** and after purification by flash-chromatography on silica gel (petroleum ether : ethyl acetate; 100:1) compound **2b** (272 mg, 61 %) was obtained as a as a yellow solid. Mp. 300 °C decomp. *R<sub>f</sub>* (petroleum ether: ethyl acetate, 10:1): 0.44. <sup>1</sup>H-NMR (300 MHz, CD<sub>2</sub>Cl<sub>2</sub>, δ ppm): 0.99 (t, *J* = 6 Hz, 3 H), 1.51 (m, 2 H), 1.70 (m, 2 H), 3.25 (t, *J* = 6 Hz, 2 H), 3.95 ppm (s, 1H), 6.81 (s, 1 H), 6.91 (dd, *J* = 3 Hz, *J* = 9 Hz, 1 H), 7.33 (m, 2 H), 7.76 (d, *J* = 9 Hz, 1 H), 7.87 (m, 2 H), 8.08 (s, 1 H), 8.21 (s, 1H). <sup>13</sup>C-NMR (300 MHz, CD<sub>2</sub>Cl<sub>2</sub>, δ ppm): 13.80 (CH<sub>3</sub>), 20.50 (CH<sub>2</sub>), 31.47 (CH<sub>2</sub>),

43.62 (CH<sub>2</sub>), 100.74 (CH), 120.56 (C<sub>quat</sub>), 122.22 (CH), 123.49 (C<sub>quat</sub>), 125.31 (CH), 126.05 (C<sub>quat</sub>), 127.31 (CH, CH), 128.22 (CH), 129.16 (CH, CH), 132.60 (C<sub>quat</sub>), 133.97 (C<sub>quat</sub>), 145.62 (C<sub>quat</sub>), IR ( $\nu$ , cm<sup>-1</sup>): 3393 (w), 3065 (w), 2918 (m), 1480 (m), 1461 (m), 1277 (m), 1136 (w), MS (ES-MS)  $m/z$ : 250 (M<sup>+</sup>+H).

#### ***N*-Butylnaphthalen-2-amine (2c)<sup>2</sup>**

This compound was synthesized according to **GP 2** and after purification by flash-chromatography on silica gel (petroleum ether : ethyl acetate; 100:1) compound **2c** (370 mg, 77 %) was obtained as a white solid. Mp. 65 - 70 °C.  $R_f$  (petroleum ether : ethyl acetate; 10:1): 0.64.

<sup>1</sup>H-NMR (300 MHz, CD<sub>2</sub>Cl<sub>2</sub>,  $\delta$  ppm): 0.99 (t,  $J$  = 6 Hz, 3 H), 1.48 (m, 2 H), 1.67 (m, 2 H), 3.20 (t,  $J$  = 6 Hz, 2 H), 3.86 (s, 1 H), 6.78 (s, 1 H), 6.87 (dd,  $J$  = 3 Hz,  $J$  = 9 Hz, 1 H), 7.16 (t,  $J$  = 6 Hz, 1 H), 7.34 (t,  $J$  = 6 Hz, 1 H), 7.61 (d,  $J$  = 9 Hz, 2 H), 7.65 (d,  $J$  = 6 Hz, 1 H). <sup>13</sup>C-NMR (300 MHz, CD<sub>2</sub>Cl<sub>2</sub>,  $\delta$  ppm): 13.81 (CH<sub>3</sub>), 20.47 (CH<sub>2</sub>), 31.59 (CH<sub>2</sub>), 43.71 (CH<sub>2</sub>), 103.81 (CH), 118.09 (CH), 121.69 (CH), 125.80 (CH), 126.27 (CH), 127.39 (CH), 127.60 (C<sub>quat</sub>), 128.74 (CH), 135.50 (C<sub>quat</sub>), 146.49 (C<sub>quat</sub>). IR ( $\nu$ , cm<sup>-1</sup>): 3048 (w), 2956 (m), 2927 (m), 1602 (m), 1473 (m), 1359 (m), 1080 (w). MS (ES-MS)  $m/z$ : 200 (M<sup>+</sup>+H).

c)  $^1\text{H}$  and  $^{13}\text{C}$  NMR spectra of **2a** – **2c**

$^1\text{H}$  NMR spectra of **2a** recorded in  $\text{CDCl}_3$  (298K, 300 MHz)

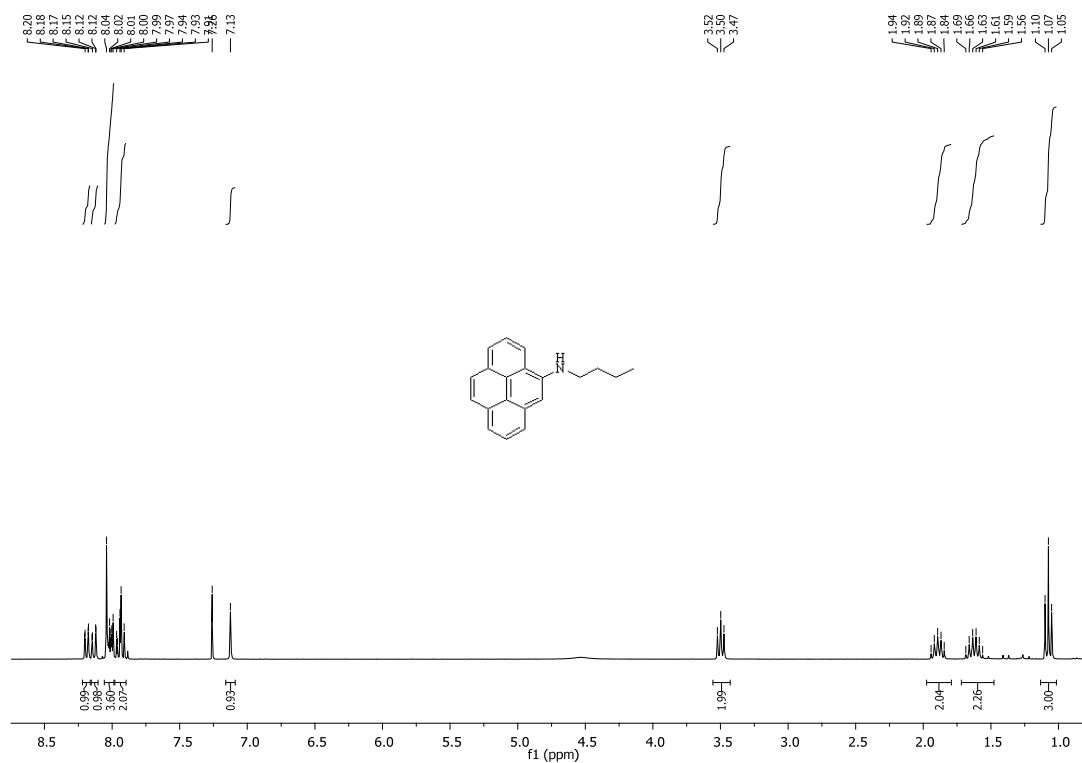

$^{13}\text{C}$  NMR spectra of **2a** recorded in  $\text{CDCl}_3$  (298K, 75 MHz)

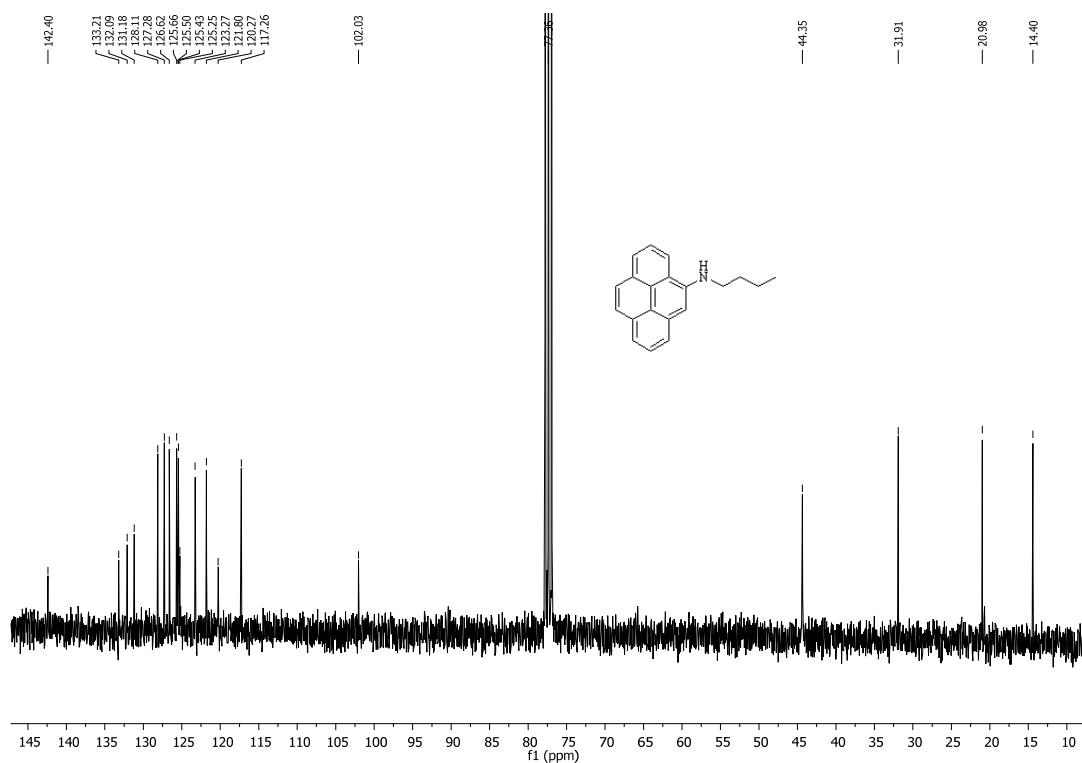

DEPT NMR spectra of **2a** recorded in CDCl<sub>3</sub> (298K, 75 MHz)

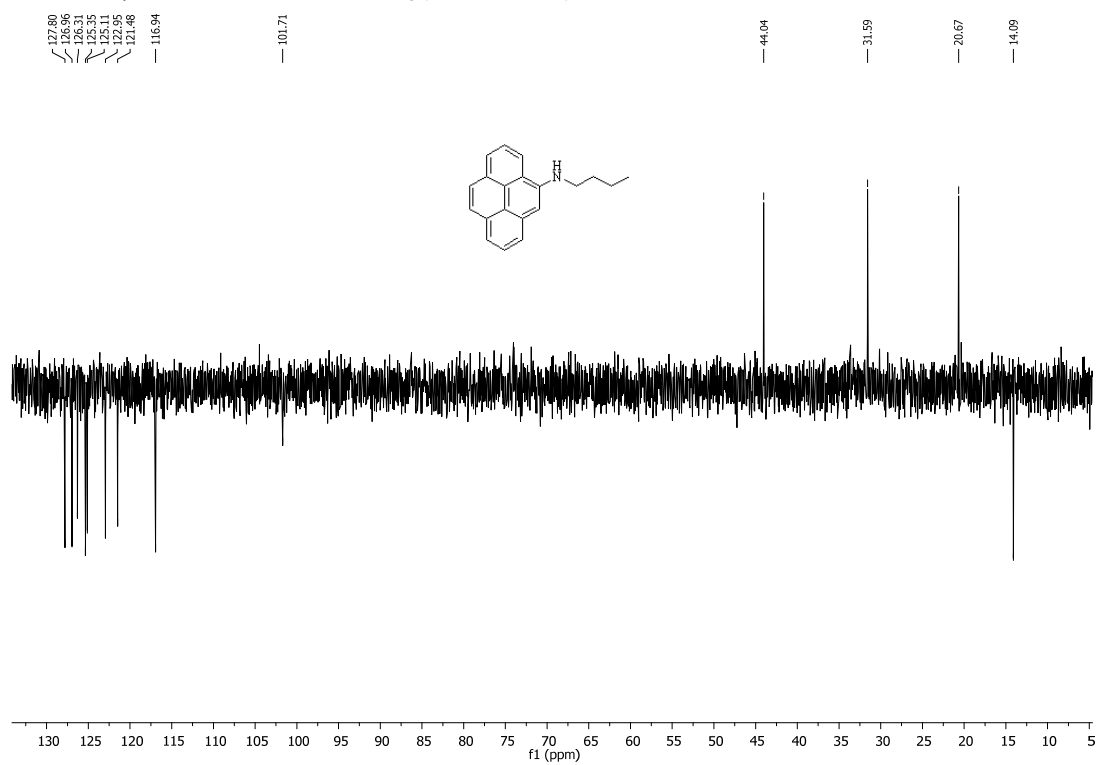

$^1\text{H}$  NMR spectra of **2b** recorded in  $\text{CD}_2\text{Cl}_2$  (298K, 300 MHz)

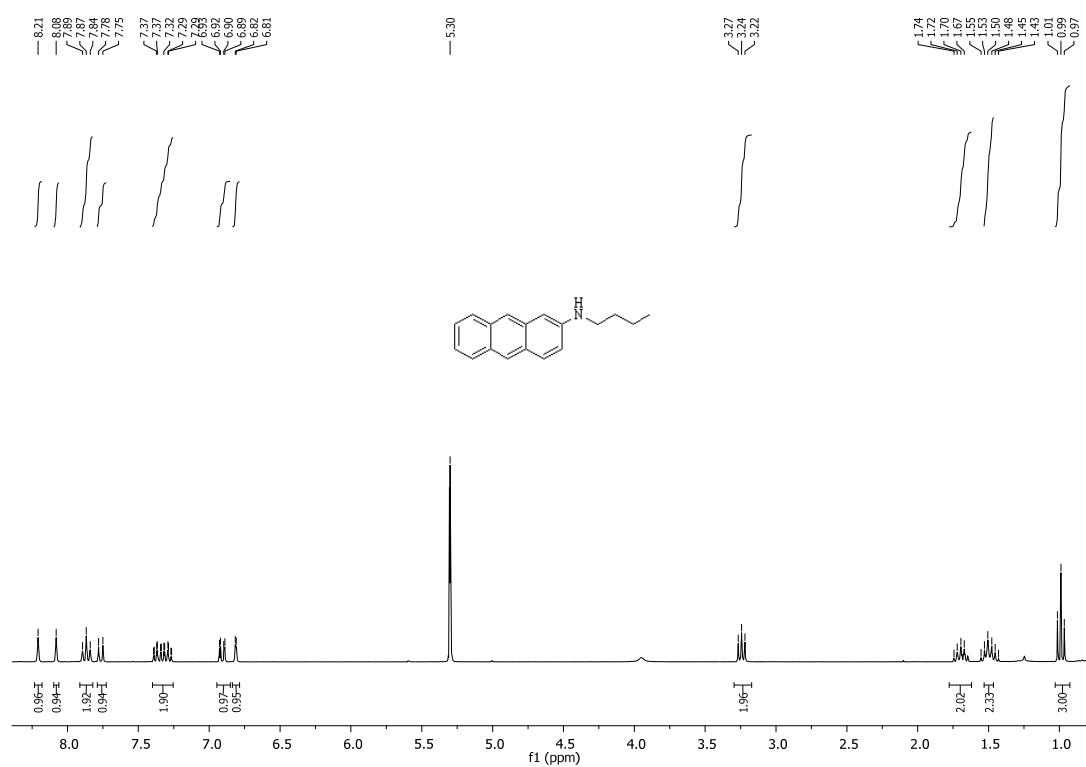

$^{13}\text{C}$  NMR spectra of **2b** recorded in  $\text{CH}_3\text{Cl}$  (298K, 75 MHz)

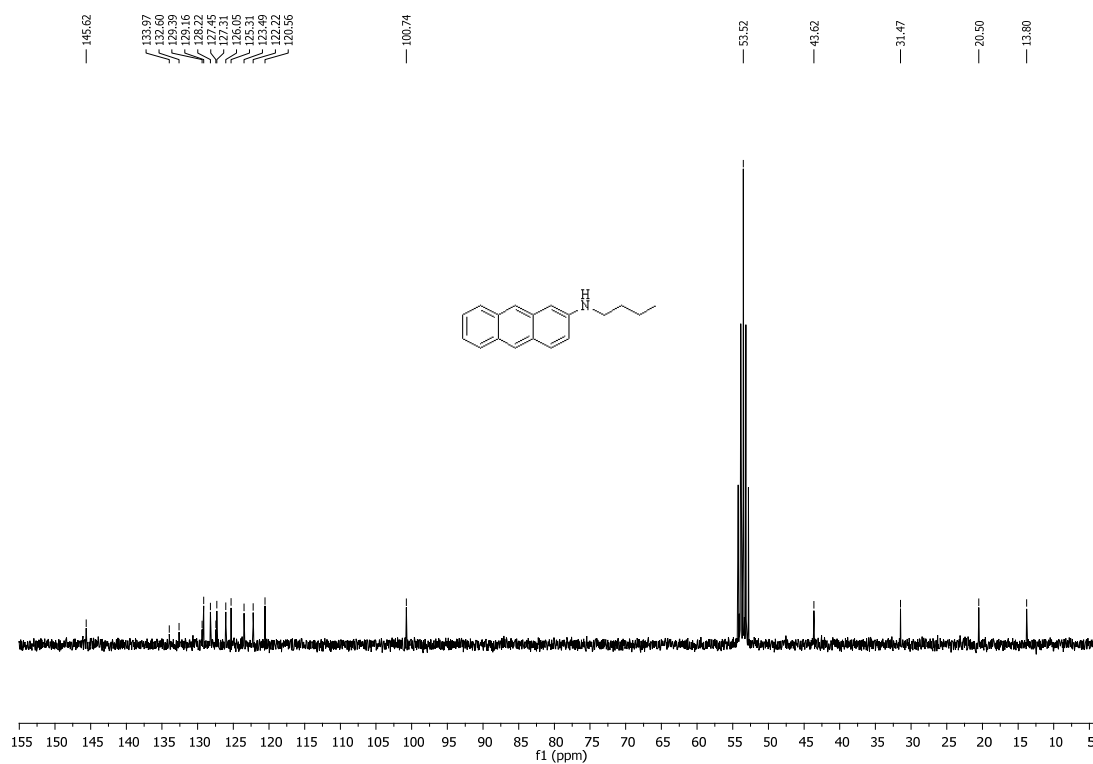

DEPT NMR spectra of **2b** recorded in CD<sub>2</sub>Cl<sub>2</sub> (298K, 75 MHz)

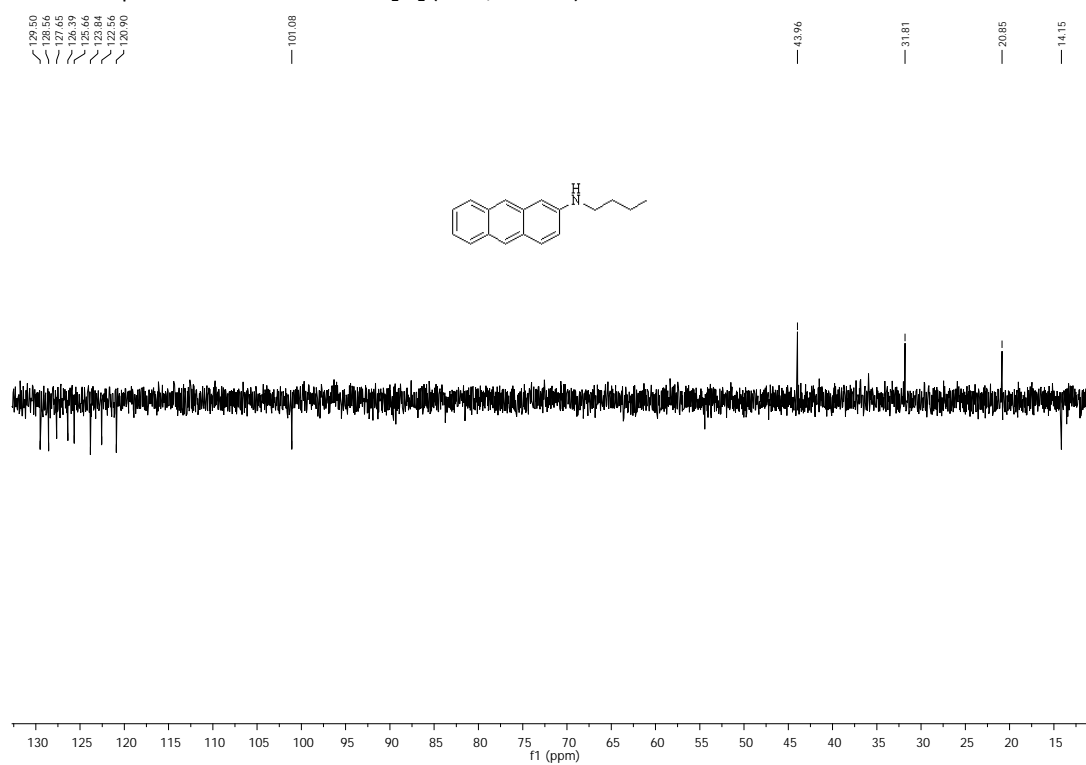

d)  $^1\text{H}$  and  $^{13}\text{C}$  NMR spectra of **3a** – **3c**

$^1\text{H}$  NMR spectra of **3a** recorded in  $\text{CF}_3\text{COOD}$  (298K, 300 MHz)

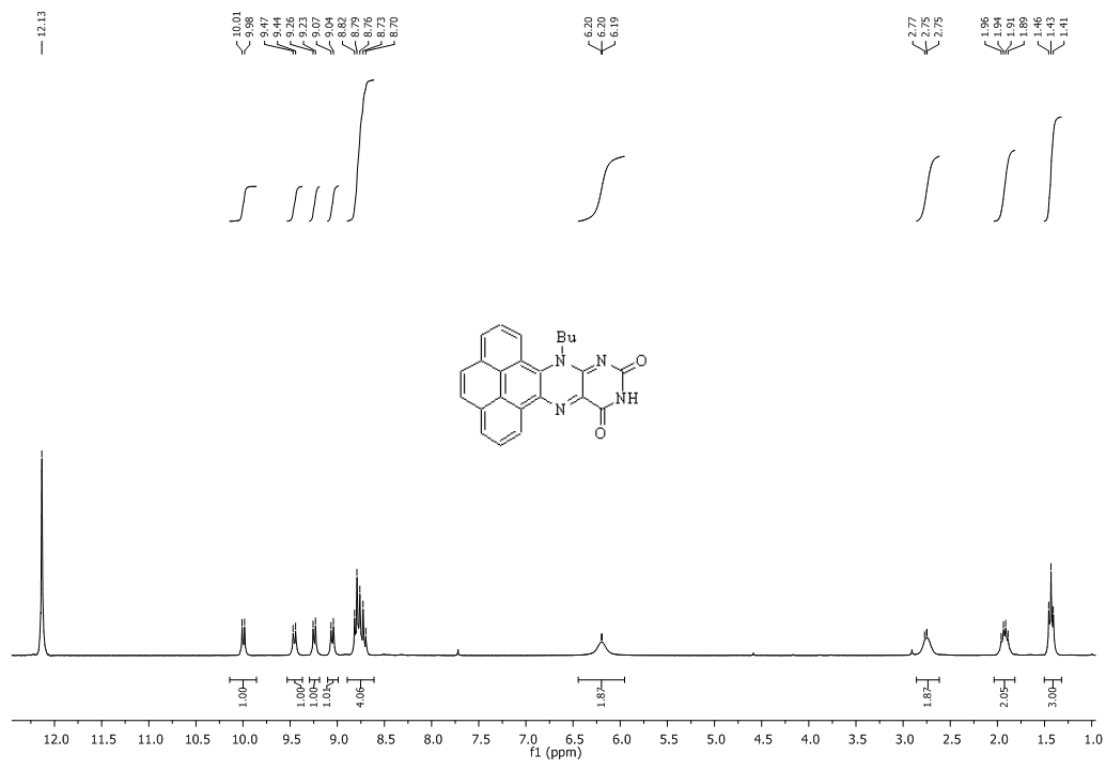

$^{13}\text{C}$  NMR spectra of **3a** recorded in  $\text{CF}_3\text{COOD}$  (298K, 75 MHz)

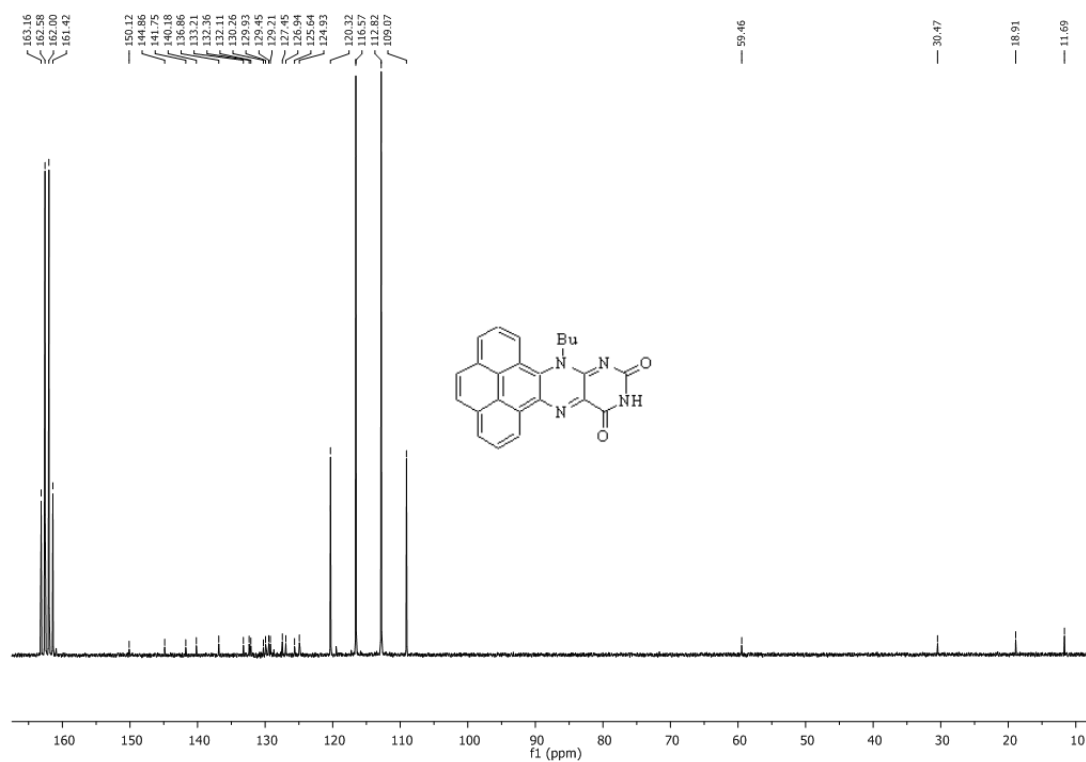

$^1\text{H}$  NMR spectra of **3b** recorded in  $\text{CF}_3\text{COOD}$  (298K, 300 MHz)

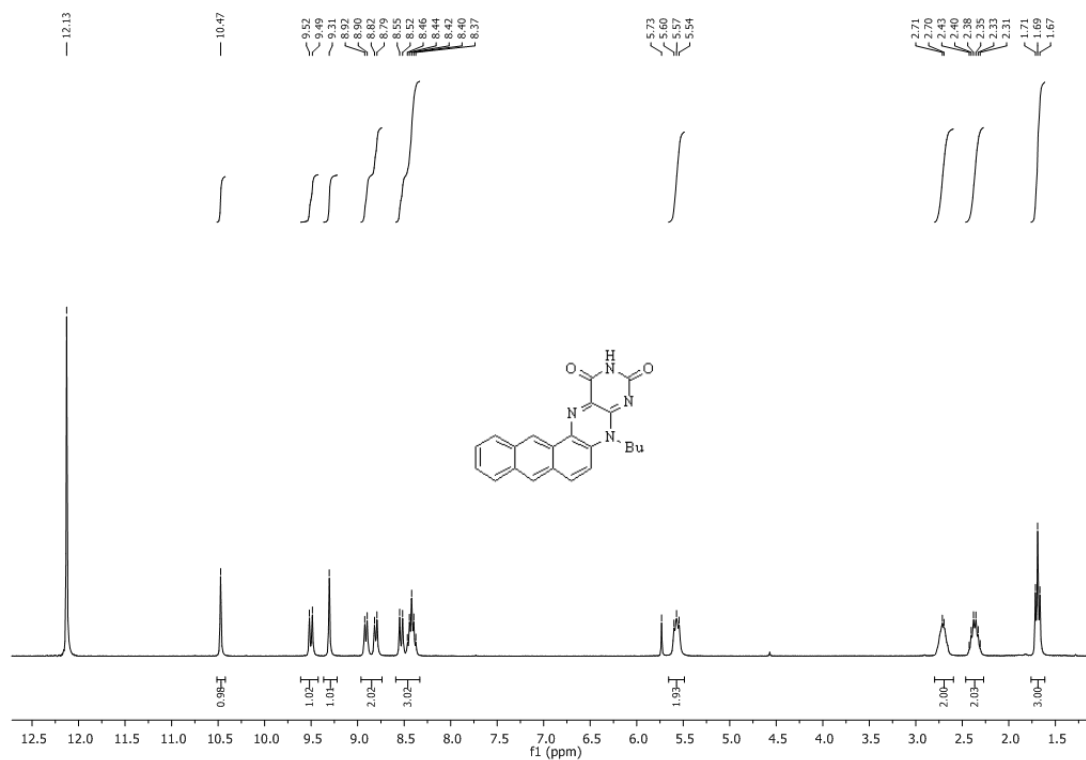

$^{13}\text{C}$  NMR spectra of **3b** recorded in  $\text{CF}_3\text{COOD}$  (298K, 75 MHz)

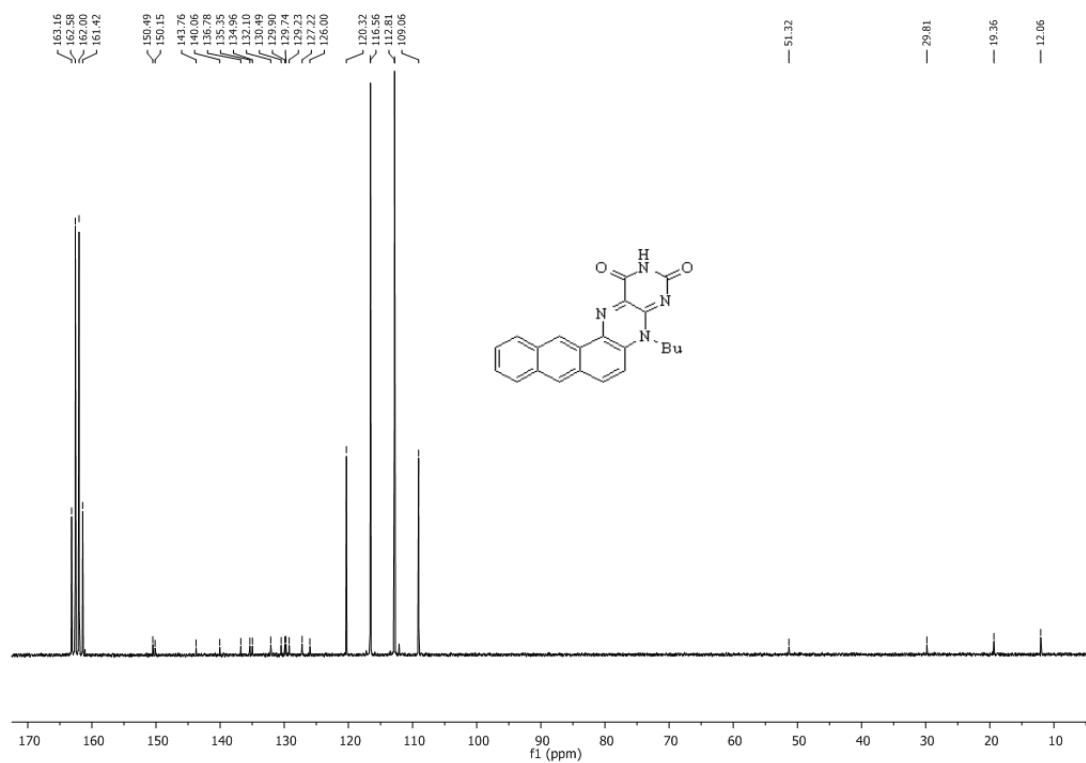

DEPT spectra of **3b** recorded in CF<sub>3</sub>COOD (298K, 75 MHz)

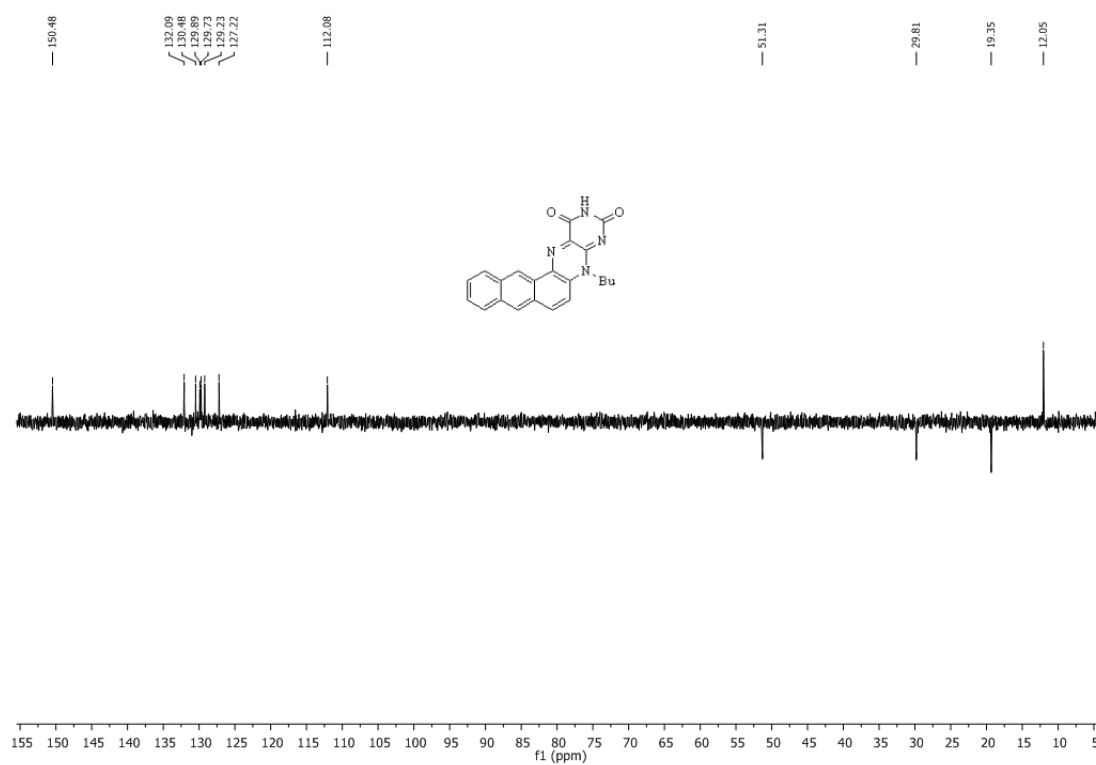

$^1\text{H}$  NMR spectra of **3c** recorded in  $\text{CF}_3\text{COOD}$  (298K, 300 MHz)

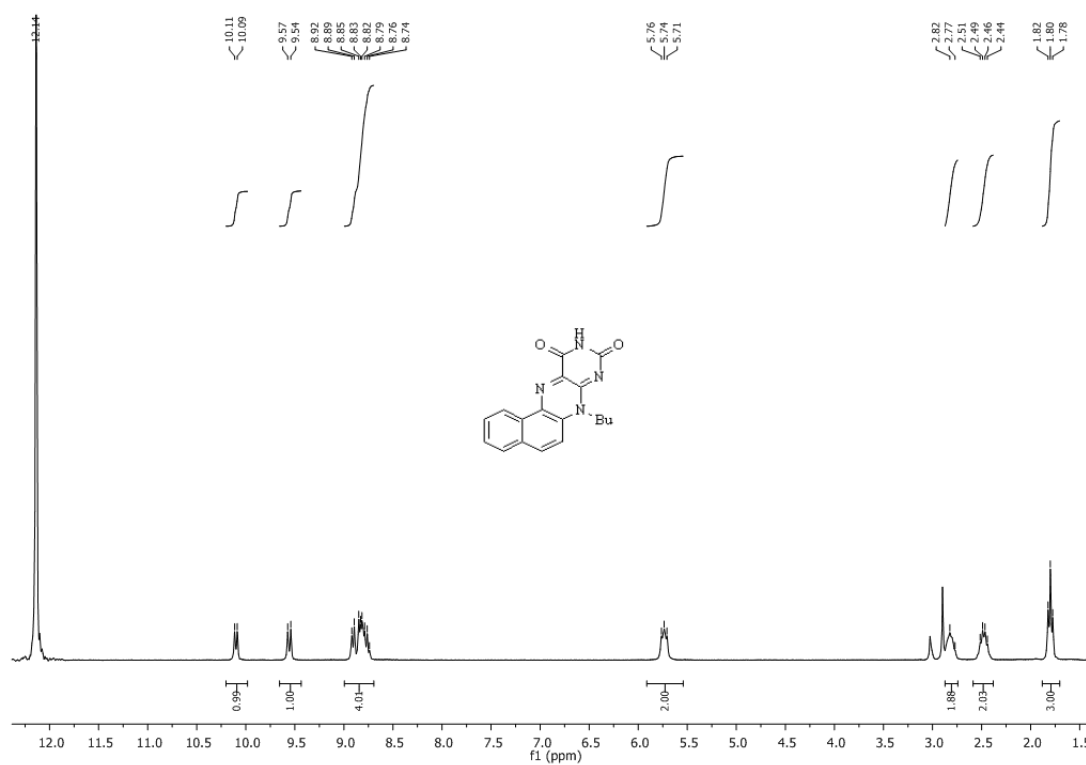

$^{13}\text{C}$  NMR spectra of **3c** recorded in  $\text{CF}_3\text{COOD}$  (298K, 75 MHz)

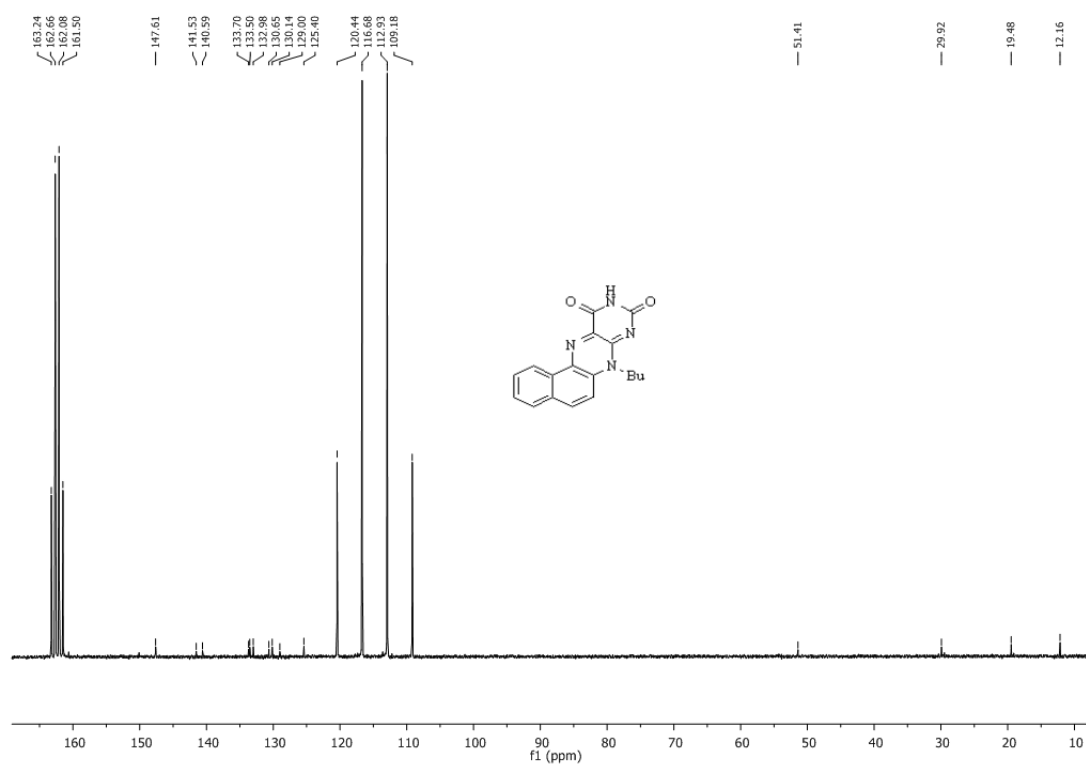

**e) Selected molecular orbitals for compounds 3a, 3b, and 3c.**

For each molecular orbital, its energy in eV is given.

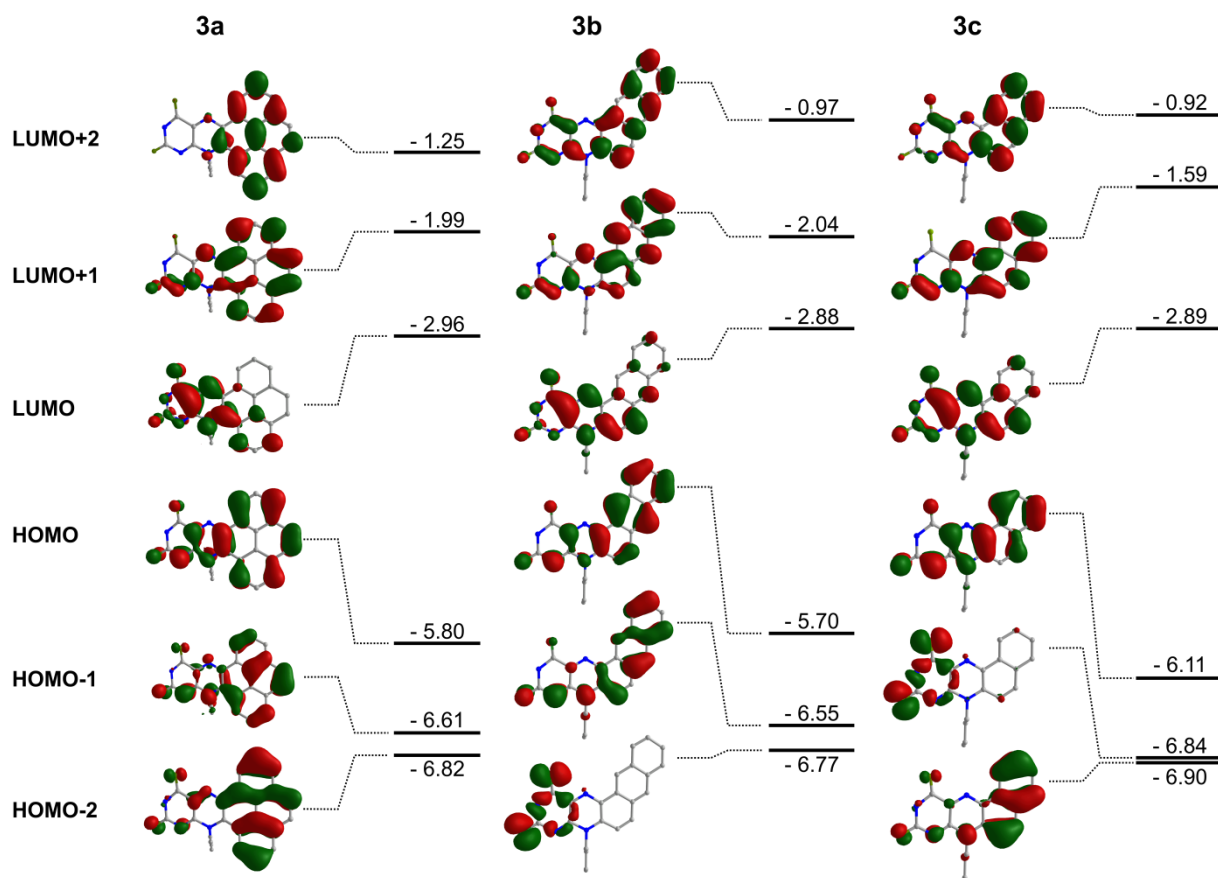

**f) References**

1. H. G. O. Becker, W. Berger, G. Domschke, E. Fanghänel, J. Faust, M. Fischer, F. Gentz, K. Gewald, R. Gluch, R. Mayer, K. Müller, D. Pavel, H. Schmidt, K. Schollberg, K. Schwetlick, E. Seiler and G. Zeppenfeld, *Organikum*, Johann Ambrosius Barth Verlag, Heidelberg, Leipzig, 1996.
2. J.H. Huang and L.-M. Yang, *Org. Lett.* 2011, **13**, 3750-3753.
